# Supplementary material
Source: publisher figshare collection journal article supplement (https://frontiersin.figshare.com/ndownloader/files/13267355)
Supplement: Supplementary file [file 13267355]

**COP $\gamma$ 1 O-GlcNAc MS (Table 2):** Complete data set for COP $\gamma$ 1 O-GlcNAc site-mapping. Two biological replicates are included. All replicates include a complete peptide list and O-GlcNAc-modified peptide list.

**SILAC BFA data (Table 3):** Complete data set for BFA glycoproteomics workflow. Contains lists of proteins with concordant BFA-dependent changes across biological replicates that also have a fold-change magnitude greater than 2 (nuclear fractions) or 1.5 (cytoplasmic fractions).

**Alkyne bead enrichment test (Table 4):** Total spectral counts for each protein identified in proof of principle alkyne-bead click enrichment test. Complete data set for Figure 2.

**SILAC heavy incorporation test (Table 5):** Peptide data from SILAC incorporation test. Heavy arginine (Label: $^{13}\text{C}_8^{15}\text{N}_2$  (+10.02)) and heavy lysine (Label: $^{13}\text{C}_6^{15}\text{N}_2$  (+8.01)) were searched as variable modifications and found in every non-contaminant protein.
